# Supplementary material for: Investigating the Effects of Magnitude-Space Based Numerical Working Memory Loads on the SNARC Effect Under Different Number Judgment Tasks
Source: Research Square preprint supplement (doi:10.21203/rs.3.rs-7706930/v1), 2025-09-30
Supplement: Supplementary file 1 [file 7a61d271baea9d32ef53e73a.docx]

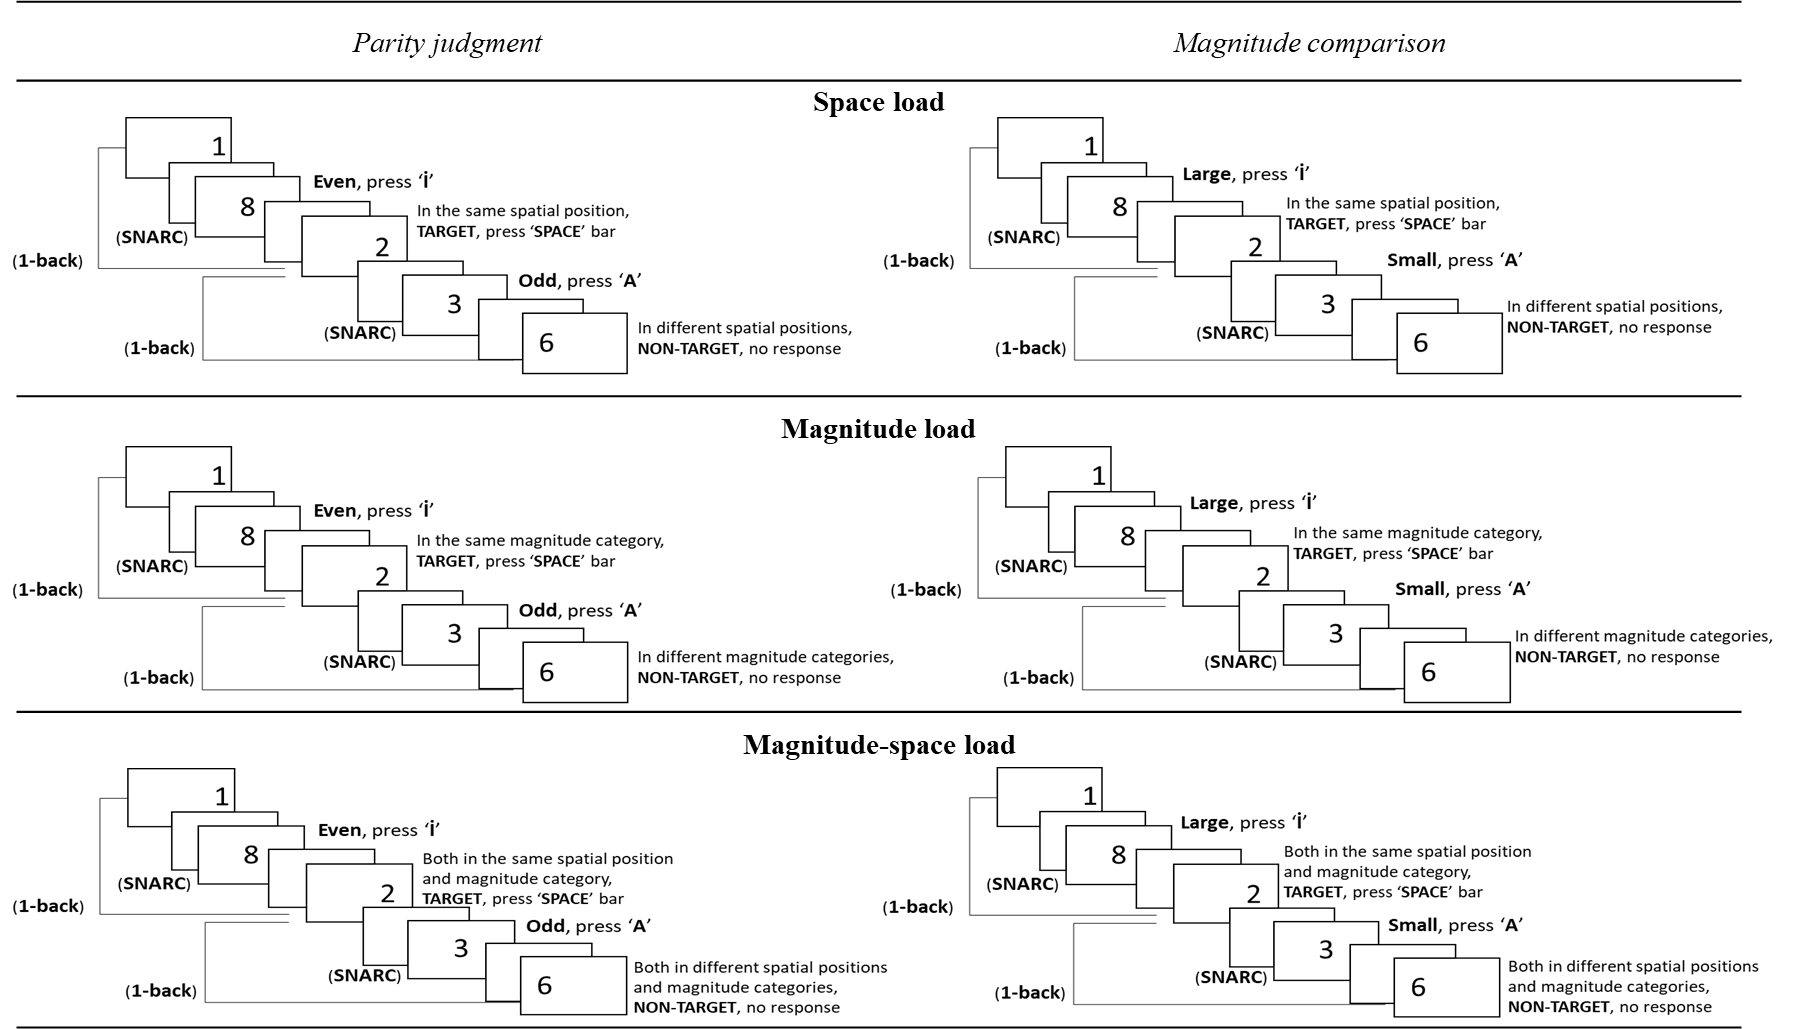


**SOM Fig. 1** Experimental Flow for the MNL Incompatible Conditions


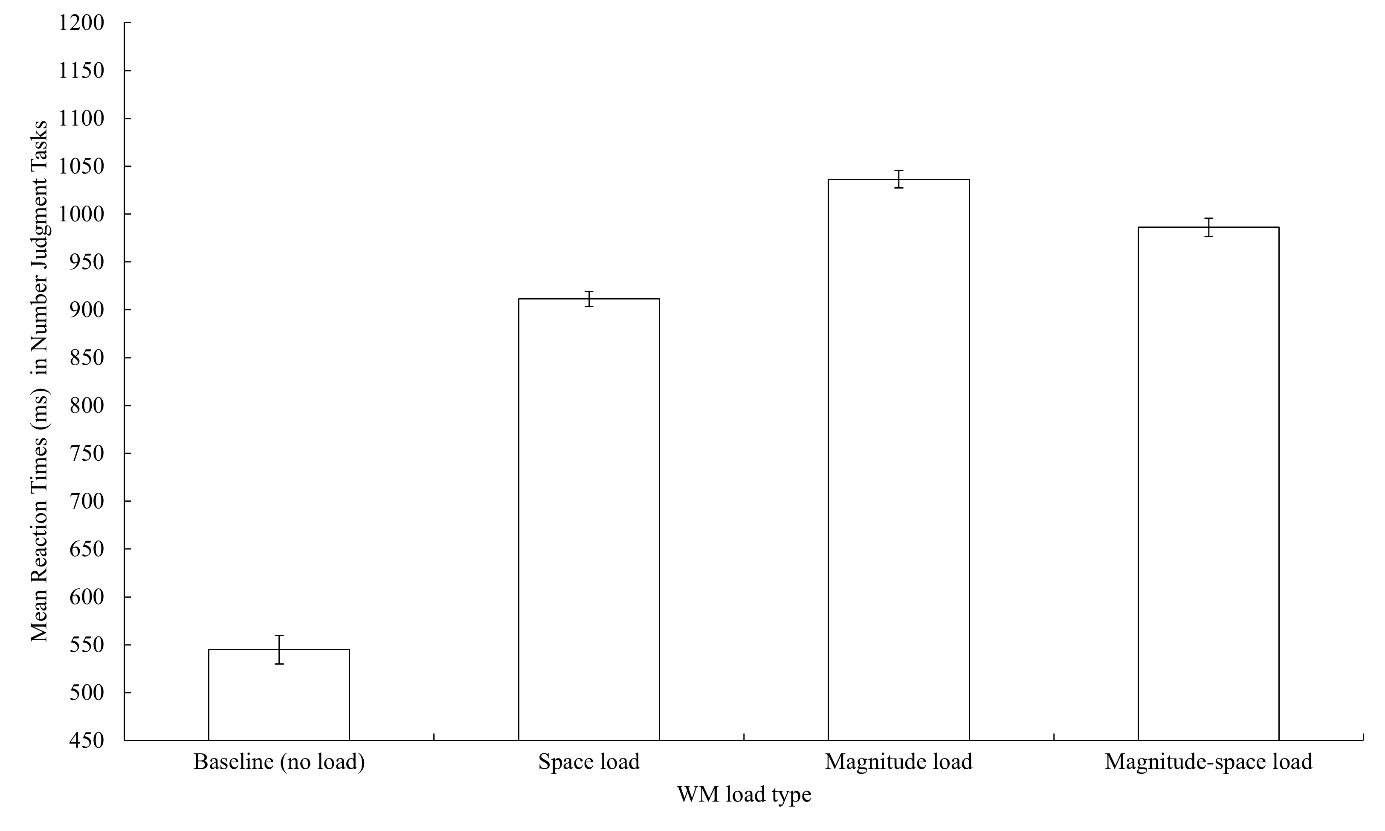


**SOM Fig 2** Mean RTs as a Function of WM Load Type. Error Bars Represent 95% CIs, Adjusted for Repeated Measures


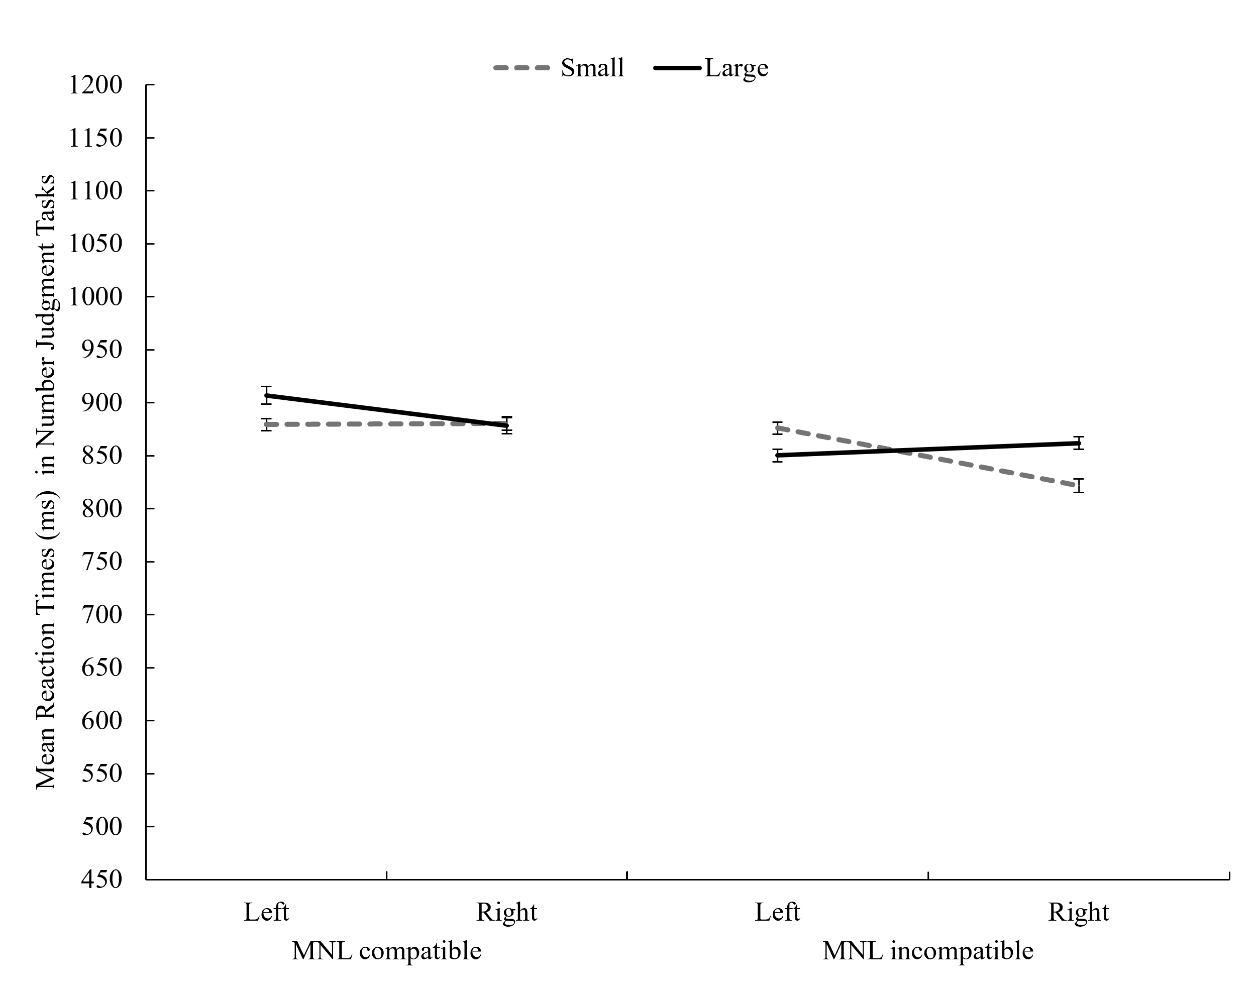


**SOM Fig 3** Mean RTs as a Function of MNL Compatibility (Compatible, Incompatible), Magnitude (Small, Large), and Response-Side (Left, Right). Error Bars Represent 95% CIs, Adjusted for Repeated Measures


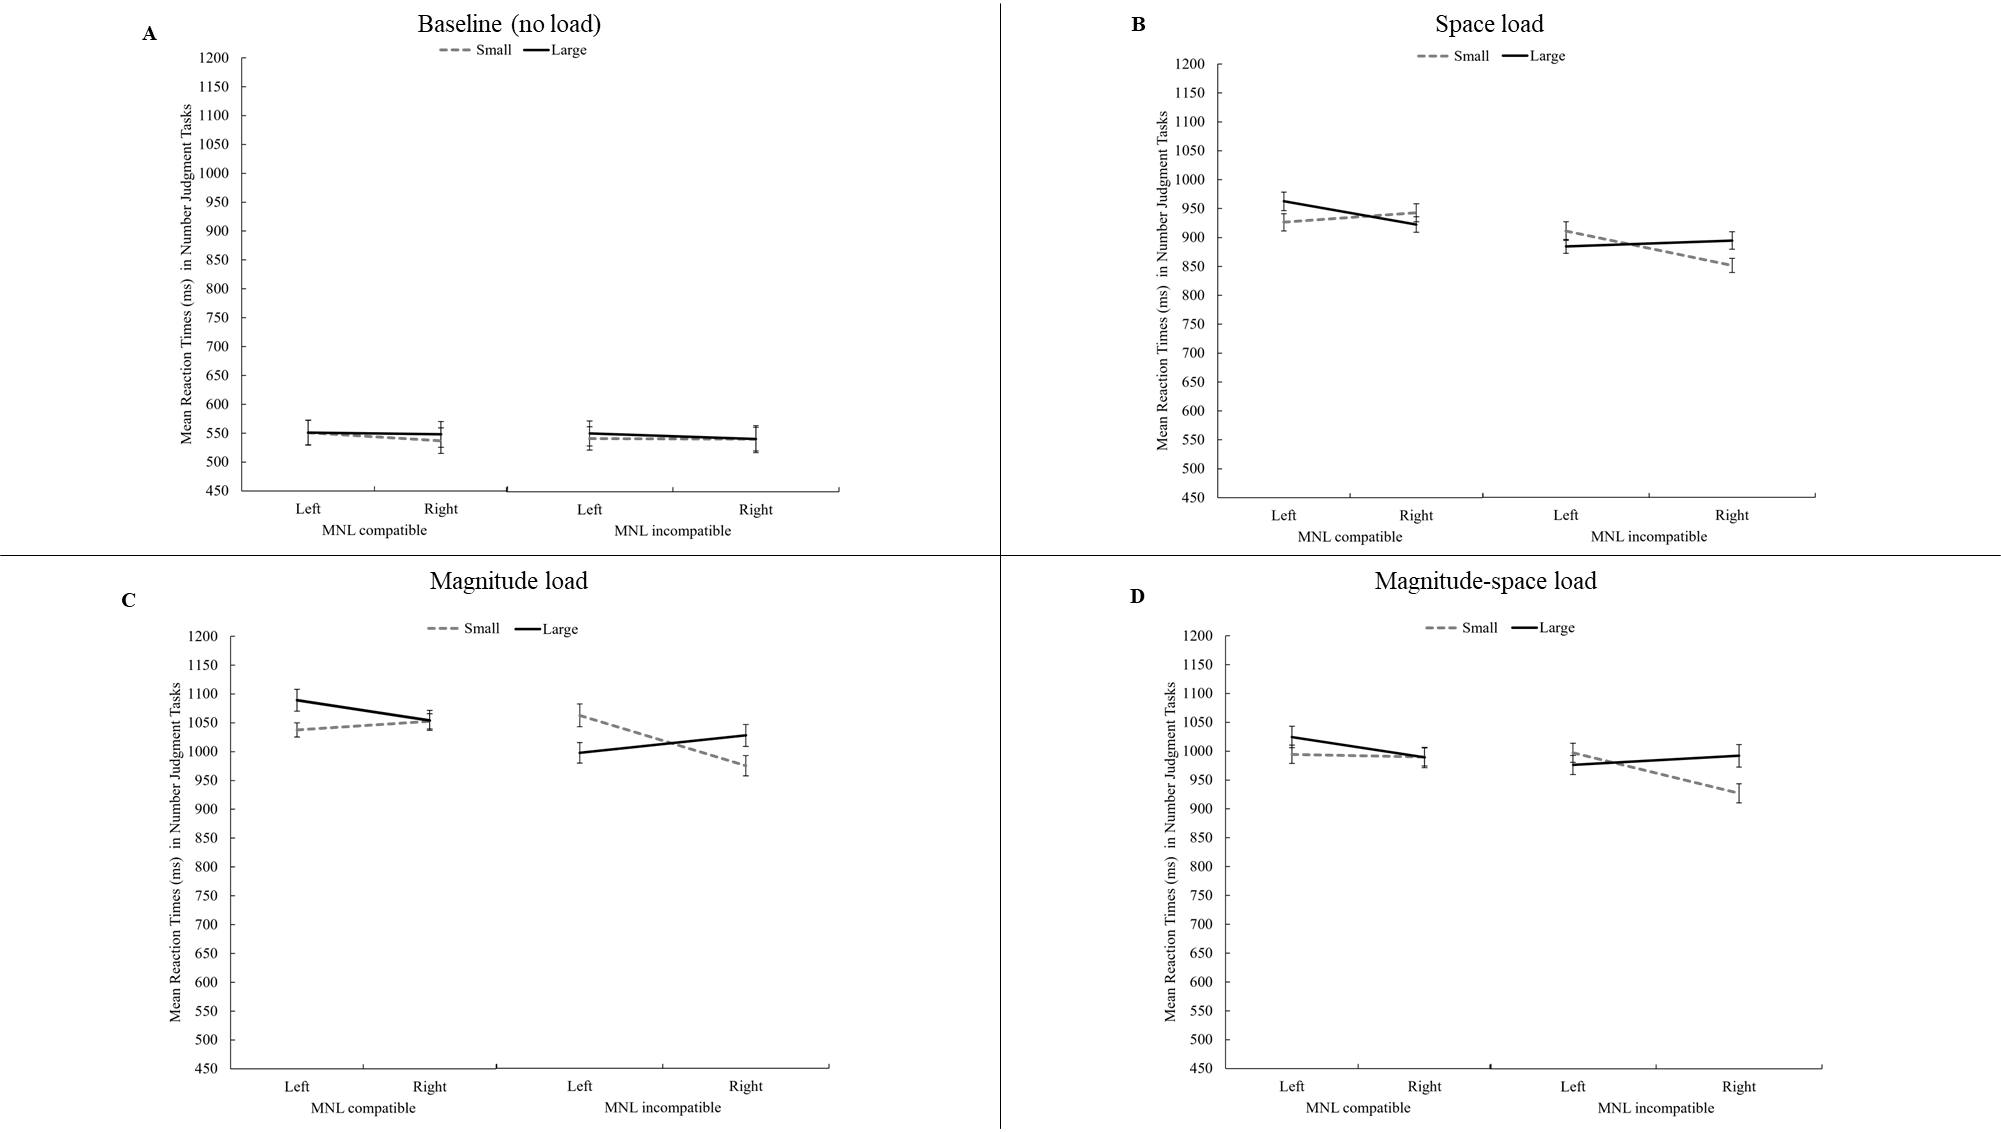


**SOM Fig. 4** Mean RTs as a Function of MNL Compatibility (Compatible, Incompatible), WM Load Type (Baseline, Space, Magnitude, and Magnitude-Space Load), Magnitude (Small, Large), and Response-Side (Left, Right). Error Bars Represent 95% CIs, Adjusted for Repeated Measures
